# Supplementary material
Source: PubMed Central journal article supplement (PMC6675666)
Supplement: NIHMS1520503-supplement-1.pdf [file NIHMS1520503-supplement-1.pdf]

**Supplementary Table 1. Mendelian randomization estimates using MR-Egger and weighted median approach**

| <b>Disease</b> | <b>MR-Egger</b>                              |                                       | <b>Weighted median</b>          |
|----------------|----------------------------------------------|---------------------------------------|---------------------------------|
|                | <b>Intercept <i>P</i> value <sup>a</sup></b> | <b>Slope OR (95% CI) <sup>b</sup></b> | <b>OR (95% CI) <sup>c</sup></b> |
| <b>BE</b>      | 0.793                                        | 1.32 (0.59-2.98)                      | 1.12 (0.67-1.88)                |
| <b>EAC</b>     | 0.749                                        | 0.60 (0.22-1.61)                      | 0.66 (0.36-1.23)                |

<sup>a</sup>The *P*-value of the intercept is as a valid test of directional pleiotropy.

<sup>b</sup>The slope of the MR-Egger regression is the pleiotropy-adjusted causal effect estimate.

<sup>c</sup>The OR represent increase/decrease of risk per 20 nmol/L increase of 25(OH)D.

**Supplementary Table 2. Associations of the 25(OH)D-associated SNPs with other phenotypes**

| <b>SNP</b> | <b>Chr</b> | <b>Gene</b>    | <b>Phenotype</b>                         | <b>Beta</b> | <b>P</b> | <b>PMID</b> |
|------------|------------|----------------|------------------------------------------|-------------|----------|-------------|
| rs10741657 | 11         | <i>CYP2R1</i>  | Hip circumference                        | 0.015       | 1.10E-03 | 25673412    |
|            |            |                | Height                                   | 0.009       | 2.00E-03 | 25282103    |
|            |            |                | Conscientiousness                        | 0.232       | 2.22E-03 | 21173776    |
| rs10745742 | 12         | <i>AMDHD1</i>  | log(eGFR creatinine in non diabetics)    | -0.003      | 2.60E-03 | 26831199    |
|            |            |                | Subject well being                       | -0.011      | 1.28E-03 | 27089181    |
|            |            |                | 2 hour fasting glucose                   | -0.055      | 3.58E-03 | 20081857    |
|            |            |                | Birthweight                              | 0.022       | 9.10E-03 | 23202124    |
|            |            |                | Visual refractive error                  | 0.089       | 9.22E-03 | 23474815    |
|            |            |                | Extraversion                             | -0.014      | 1.24E-02 | 26362575    |
|            |            |                | Total cholesterol                        | NA          | 1.66E-02 | 20339536    |
| rs12785878 | 11         | <i>DHCR7</i>   | Attention deficit hyperactivity disorder | NA          | 4.03E-05 | 20732625    |
|            |            |                | Waist hip ratio in males $\leq$ 50 years | 0.025       | 9.00E-03 | 26426971    |
|            |            |                | Total cholesterol                        | -0.014      | 1.41E-02 | 24097068    |
| rs17216707 | 20         | <i>CYP24A1</i> | log(eGFR creatinine)                     | 0.002       | 1.70E-02 | 26831199    |
|            |            |                | log(eGFR creatinine)                     | 0.008       | 6.00E-13 | 26831199    |
|            |            |                | Serum creatinine                         | NA          | 8.90E-06 | 20383146    |
|            |            |                | Femoral neck bone mineral density        | NA          | 8.26E-04 | 22504420    |
|            |            |                | Cystatin C in serum                      | NA          | 7.50E-03 | 20383146    |
| rs3755967  | 4          | <i>GC</i>      | Type II diabetes                         | 0.049       | 1.10E-02 | 24509480    |
|            |            |                | Height                                   | -0.009      | 4.90E-03 | 25282103    |
|            |            |                | log(Proinsulin)                          | -0.021      | 6.14E-03 | 21873549    |
|            |            |                | Alzheimers disease                       | 0.036       | 3.35E-02 | 24162737    |
|            |            |                | Waist hip ratio in males $\leq$ 50 years | -0.017      | 3.60E-02 | 26426971    |
|            |            |                | Chronic kidney disease                   | NA          | 3.60E-02 | 20383146    |
| rs8018720  | 14         | <i>SEC23A</i>  | Years of educational attainment          | 0.009       | 3.63E-02 | 23722424    |
|            |            |                | Rheumatoid arthritis                     | 0.083       | 8.43E-03 | 20453842    |
|            |            |                | Hip circumference in males               | 0.02        | 2.10E-02 | 25673412    |
|            |            |                | Waist hip ratio tails                    | -0.1        | 3.20E-02 | 23563607    |
|            |            |                | Tardive dyskinesia                       | NA          | 3.63E-02 | 19875103    |
|            |            |                | Gout                                     | -0.087      | 4.22E-02 | 23263486    |
|            |            |                | Body fat percentage                      | -0.014      | 4.40E-02 | 26833246    |
|            |            |                | Simpson Angus Scale                      | NA          | 4.47E-02 | 19875103    |
| log(DI)    | 0.055      | 4.62E-02       | 24699409                                 |             |          |             |
